# Supplementary material for: Fabrication of silver porous frameworks using poly(ethyleneimine) hydrogel as a soft sacrificial template
Source: Royal Society of Chemistry journal article supplement (doi:10.1039/b507125a), 2005-01-01
Supplement: b507125a.pdf [file b507125a.pdf]

## Fabrication of Silver Porous Frameworks Using Poly(ethyleneimine) Hydrogel as a Soft Sacrificial Template

Ren-Hua Jin\* and Jian-Jun Yuan

Synthetic Chemistry Lab, Kawamura Institute of Chemical Research,  
631 Sakado, Sakura, Chiba 285-0078, Japan  
e-mail:jin@kicr.or.jp

**TEM observation:** Aqueous samples from **Run 1** and **Run 2** were dropped onto a carbon coated copper grids, respectively, and then visualized by JEM-200CX (JEOL) instrument with an acceleration voltage of 100kV.

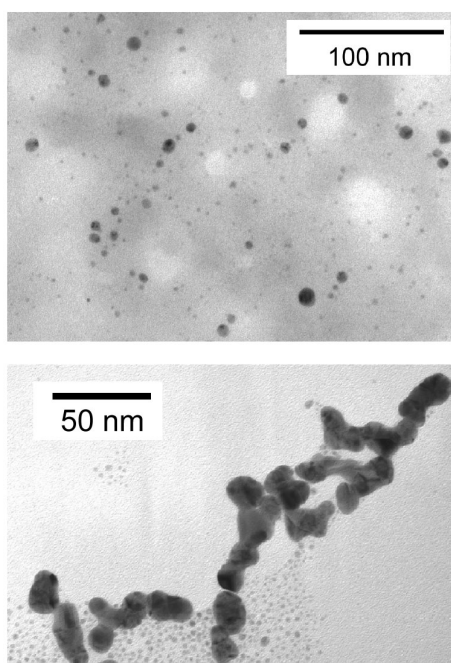

The above figure shows TEM images of silver nanoparticles produced from **Run 1** (top) and **Run 2** (bottom). **Run 1** produced spherical silver nanoparticles while **Run 2** resulted in irregularly shaped (rod-like) nanoparticles.
